# Supplementary material for: Preliminary evaluation of probiotic effects on gastrointestinal signs in dogs with multicentric lymphoma undergoing multi‐agent chemotherapy: A randomised, placebo‐controlled study
Source: PubMed Central journal article supplement (PMC8109851; doi:10.1002/vro2.2), 2021-03-29
Supplement: VRO2-8-e2-s002.pdf [file VRO2-8-e2-s002.pdf]

**Supplement 2.** Individual dog findings and lymphoma characteristics of 10 dogs undergoing CHOP-based chemotherapy for multi-centric lymphoma and receiving either probiotic or placebo. Gastrointestinal severity scores are expressed as the average score per time period. Anatomic area in bold under disease localization denotes sites of cytologic or histopathologic diagnosis of lymphoma. CD, cluster of differentiation; FI, female intact; FS, female spayed; Ig, immunoglobulin; MC, male castrated; MHC, major histocompatibility complex; MI male intact

| Dog | Treatment | Age (years) | Breed                | Sex | Disease Localization - Site of Cytologic or Histopathologic Diagnosis & Physical Examination Abnormalities | Thoracic Radiographs | Abdominal Ultrasound                                                                                                                                     | Flow                                                  | B vs T Cell | Cell Size    |
|-----|-----------|-------------|----------------------|-----|------------------------------------------------------------------------------------------------------------|----------------------|----------------------------------------------------------------------------------------------------------------------------------------------------------|-------------------------------------------------------|-------------|--------------|
| 1   | Probiotic | 13          | Jack Russell Terrier | FS  | <b>Generalized peripheral lymphadenopathy;</b> Mild hepato-/splenomegaly                                   | No abnormalities     | Not assessed                                                                                                                                             | CD45+: 99%<br>CD21+: 95%<br>Ig+: 91%<br>MHCII: 52%    | B cell      | Intermediate |
| 2   | Placebo   | 9           | Labrador Retriever   | FS  | <b>Generalized peripheral lymphadenopathy;</b> Mild hepatomegaly                                           | Not assessed         | Not assessed                                                                                                                                             | CD45+: 100%<br>CD21+: 93%<br>Ig: 98%<br>MHCII: 98%    | B cell      | Large        |
| 3   | Placebo   | 9           | Heeler               | MC  | <b>Hepatic; Abdominal effusion;</b> Mild prescapular lymph node enlargement                                | Not assessed         | Diffuse hepatomegaly with hypoechogenicity and mottled appearance to parenchyma; Diffusely hypoechoic intra-abdominal lymph nodes (0.8-3.6 cm); Moderate | CD45+: 99%<br>CD5+: 60%<br>CD4+: 32%<br>CD4+CD8+: 55% | T cell      | Intermediate |

|    |           |    |                      |    |                                                                     |                  |                                                                                        |                                                   |              |              |
|----|-----------|----|----------------------|----|---------------------------------------------------------------------|------------------|----------------------------------------------------------------------------------------|---------------------------------------------------|--------------|--------------|
|    |           |    |                      |    |                                                                     |                  | volume anechoic peritoneal effusion                                                    |                                                   |              |              |
| 4  | Probiotic | 8  | Scottish Terrier     | FS | <b>Generalized peripheral lymphadenopathy</b>                       | Not assessed     | Not assessed                                                                           | Not assessed                                      | Not assessed | Large        |
| 5  | Placebo   | 6  | Labrador Retriever   | MC | <b>Generalized peripheral lymphadenopathy</b>                       | No abnormalities | Hepatic hypoechogenicity; Mottled spleen; Intra-abdominal lymphadenopathy (2.4-3.2 cm) | Not assessed                                      | Not assessed | Large        |
| 6  | Placebo   | 12 | Miniature Poodle     | MC | <b>Generalized peripheral lymphadenopathy</b>                       | Not assessed     | Not assessed                                                                           | Not assessed                                      | B cell       | Intermediate |
| 7  | Probiotic | 7  | Golden Retriever     | FI | <b>Generalized peripheral lymphadenopathy</b>                       | Not assessed     | Not assessed                                                                           | Not assessed                                      | T cell       | Intermediate |
| 8  | Probiotic | 4  | Golden Retriever     | FI | <b>Generalized peripheral lymphadenopathy</b>                       | Not assessed     | Not assessed                                                                           | Not assessed                                      | T cell       | Intermediate |
| 9  | Placebo   | 14 | Jack Russell Terrier | FS | <b>Generalized peripheral lymphadenopathy</b>                       | Not assessed     | Not assessed                                                                           | Not assessed                                      | B cell       | Large        |
| 10 | Probiotic | 4  | Australian Shepherd  | FS | <b>Generalized peripheral lymphadenopathy;</b><br>Mild hepatomegaly | Not assessed     | Not assessed                                                                           | CD45+: 99%<br>CD21+: 96%<br>Ig: 88%<br>MHCII: 99% | B cell       | Large        |
